# Supplementary material for: Biomedical Promise of Sustainable Microwave-Engineered Symmetric Curcumin Derivatives
Source: MDPI journal article supplement (doi:10.3390/pharmaceutics16020205), 2024-01-31
Supplement: s1 [file s1]

## Supplementary materials

### Biomedical Promise of Sustainable Microwave-Engineered Symmetric Curcumin Derivatives

Cristina Doina Nițu, Maria Mernea, Raluca-Ioana Vlasceanu, Bianca Voicu-Balasea, Madalina Andreea Badea, Florentina Monica Raduly, Valentin Rădițoiu, Alina Rădițoiu, Speranta Avram, Dan F. Mihailescu, Ionela C. Voinea and Miruna Silvia Stan

Table of contents:

- Table S1
- Table S2
- Table S3
- Figure S1
- Figure S2
- Table S4

**Table S1.** The acceptable values of compounds' physicochemical properties according to the drug-likeness rules of Lipinski, Ghose, Veber, Egan and Muegge, and the compliance of analyzed compounds with these rules. The abbreviation of properties is in agreement with those in Table 1.

| Rule     | Acceptable ranges for compounds' properties                   | D1<br>enol | D1<br>keto | D2<br>enol | D2<br>keto |
|----------|---------------------------------------------------------------|------------|------------|------------|------------|
| Lipinski | MW $\leq$ 500; MLPGP $\leq$ 4.15; HBA $\leq$ 10; HBD $\leq$ 5 | yes        | yes        | yes        | yes        |
| Ghose    | 160 $\leq$ MW $\leq$ 480; -4 $\leq$ WLOGP $\leq$ 5.6;         | yes        | yes        | yes        | yes        |
| Veber    | 40 $\leq$ MR $\leq$ 130; 20 $\leq$ atoms $\leq$ 70            | yes        | yes        | yes        | yes        |
| Egan     | NRB $\leq$ 10; TPSA $\leq$ 140                                | yes        | yes        | yes        | yes        |
| Muegge   | WLOGP $\leq$ 5.88; TPSA $\leq$ 131.6                          | yes        | yes        | yes        | yes        |

**Table S2.** Predicted pharmacokinetic properties of analyzed compounds grouped under absorption, distribution, metabolism, excretion, and toxicity.

| Property   |                                                        | D1<br>enol | D1<br>keto | D2<br>enol | D2<br>keto |
|------------|--------------------------------------------------------|------------|------------|------------|------------|
| Absorption | CaCo2 permeability (log Papp in 10 <sup>-6</sup> cm/s) | 0.598      | 0.382      | 1.106      | 1.02       |
|            | Intestinal absorption human (% absorbed)               | 78.154     | 83.25      | 89.571     | 90.805     |

|                     |                                                      |        |        |        |        |
|---------------------|------------------------------------------------------|--------|--------|--------|--------|
| <b>Distribution</b> | Steady state volume of distribution -VDss (log L/kg) | -0.139 | -0.285 | -0.09  | -0.247 |
|                     | BBB permeability (log BB)                            | -0.772 | -0.19  | -0.679 | -0.207 |
|                     | CNS permeability (log PS)                            | -2.459 | -2.414 | -2.425 | -2.332 |
|                     | CYP2D6 substrate (Yes/No)                            | No     | No     | No     | No     |
|                     | CYP3A4 substrate (Yes/No)                            | Yes    | Yes    | No     | Yes    |
| <b>Metabolism</b>   | CYP1A2 inhibitor (Yes/No)                            | No     | No     | Yes    | Yes    |
|                     | CYP2C19 inhibitor (Yes/No)                           | Yes    | Yes    | Yes    | Yes    |
|                     | CYP2C9 inhibitor (Yes/No)                            | Yes    | Yes    | Yes    | Yes    |
|                     | CYP2D6 inhibitor (Yes/No)                            | No     | No     | No     | No     |
|                     | CYP3A4 inhibitor (Yes/No)                            | Yes    | Yes    | Yes    | Yes    |
| <b>Excretion</b>    | Total clearance (log ml/min/kg)                      | 0.36   | 0.199  | 0.205  | 0.041  |
|                     | Renal OCT2 substrate (Yes/No)                        | No     | No     | No     | No     |

**Table S3.** The toxicity profile of compounds as predicted by ProTox-II web server. For each target we used “I” for inactive and “A” for active. The probability is written in brackets.

| Classification                            | Target                                                        | Prediction (Probability) |          |          |          |
|-------------------------------------------|---------------------------------------------------------------|--------------------------|----------|----------|----------|
|                                           |                                                               | D1 enol                  | D1 keto  | D2 enol  | D2 keto  |
| Organ toxicity                            | Hepatotoxicity                                                | I (0.75)                 | I (0.60) | I (0.63) | I (0.65) |
|                                           | Carcinogenicity                                               | I (0.94)                 | I (0.65) | I (0.69) | I (0.64) |
| Toxicity endpoints                        | Immunotoxicity                                                | I (0.98)                 | I (0.97) | I (0.96) | I (0.90) |
|                                           | Mutagenicity                                                  | I (0.88)                 | I (0.74) | I (0.81) | I (0.82) |
|                                           | Cytotoxicity                                                  | I (0.80)                 | I (0.71) | I (0.88) | I (0.93) |
|                                           | Aryl hydrocarbon Receptor (AhR)                               | I (0.98)                 | I (0.65) | I (0.74) | I (0.62) |
|                                           | Androgen Receptor (AR)                                        | I (0.88)                 | I (0.94) | I (0.82) | I (0.86) |
| Tox21-Nuclear receptor signaling pathways | Androgen Receptor Ligand Binding Domain (AR-LBD)              | I (0.86)                 | I (0.97) | I (0.99) | I (0.99) |
|                                           | Aromatase                                                     | I (0.86)                 | I (0.88) | I (0.84) | I (0.86) |
|                                           | Estrogen Receptor Alpha (ER)                                  | I (0.67)                 | I (0.67) | A (0.67) | A (0.70) |
|                                           | Estrogen Receptor Ligand Binding Domain (ER-LBD)              | I (0.84)                 | I (0.97) | I (0.51) | I (0.52) |
|                                           | Peroxisome Proliferator Activated Receptor Gamma (PPAR-Gamma) | I (0.92)                 | I (0.92) | I (0.78) | I (0.78) |
|                                           |                                                               |                          |          |          |          |

|                                |                                                                                       |          |          |          |          |
|--------------------------------|---------------------------------------------------------------------------------------|----------|----------|----------|----------|
| Tox21-Stress response pathways | Nuclear factor (erythroid-derived 2)-like 2/antioxidant responsive element (nrf2/ARE) | I (0.75) | I (0.84) | I (0.73) | I (0.71) |
|                                | Heat shock factor response element (HSE)                                              | I (0.94) | I (0.84) | I (0.73) | I (0.71) |
|                                | Mitochondrial Membrane Potential (MMP)                                                | I (0.98) | I (0.58) | A (0.62) | A (0.78) |
|                                | Phosphoprotein (Tumor Suppressor) p53                                                 | I (0.88) | I (0.81) | I (0.65) | I (0.66) |
|                                | ATPase family AAA domain-containing protein 5 (ATAD5)                                 | I (0.80) | I (0.88) | I (0.75) | I (0.66) |

|                |              |                |                |              |                |
|----------------|--------------|----------------|----------------|--------------|----------------|
| D1 enol        |              |                | D1 keto        |              |                |
| AR : -5.9      | AR an.: -6.3 | ER α: -7.8     | AR : -6.0      | AR an.: -7.1 | ER α: -7.5     |
| ER α an.: -8.5 | ER β: -5.1   | ER β an.: -7.7 | ER α an.: -8.3 | ER β: -4.3   | ER β an.: -7.8 |
| GR: -8.9       | GR an.: -8.7 | LXR α: -9.3    | GR: -9.1       | GR an.: -7.5 | LXR α: -9.5    |
| LXR β: -8.7    | MR: -4.8     | PPAR α: -8.2   | LXR β: -9.1    | MR: -5.5     | PPAR α: -9.6   |
| PPAR β: -8.6   | PPAR γ: -9.0 | PR: -2.1       | PPAR β: -8.8   | PPAR γ: -8.9 | PR: -2.5       |
| RXR α: -9.8    | TR α: -5.0   | TR β: -6.9     | RXR α: -8.5    | TR α: -5.2   | TR β: -6.4     |

  

|                |              |                |                |              |                |
|----------------|--------------|----------------|----------------|--------------|----------------|
| D2 enol        |              |                | D2 keto        |              |                |
| AR : -7.8      | AR an.: -8.1 | ER α: -8.2     | AR : -7.6      | AR an.: -8.1 | ER α: -8.2     |
| ER α an.: -8.4 | ER β: -8.4   | ER β an.: -7.9 | ER α an.: -8.5 | ER β: -8.4   | ER β an.: -8.2 |
| GR: -9.0       | GR an.: -8.0 | LXR α: -9.2    | GR: -9.2       | GR an.: -8.1 | LXR α: -9.5    |
| LXR β: -9.4    | MR: -8.3     | PPAR α: -7.9   | LXR β: -9.7    | MR: -8.2     | PPAR α: -7.9   |
| PPAR β: -7.8   | PPAR γ: -8.5 | PR: -2.5       | PPAR β: -8.5   | PPAR γ: -8.4 | PR: -2.3       |
| RXR α: -9.4    | TR α: -9.0   | TR β: -9.4     | RXR α: -9.8    | TR α: -9.3   | TR β: -9.4     |

**Figure S1.** The binding probability of compounds to 18 crystal structures belonging to the following nuclear receptors: AR – androgen receptor, ERα – estrogen receptor alpha, ERβ – estrogen receptor beta, GR – glucocorticoid receptor, LXRα – liver X receptor alpha, LXRβ – liver X receptor beta, MR – mineralocorticoid receptor, PPARα – peroxisome proliferator-activated receptor alpha, PPARβ – peroxisome proliferator-activated receptor beta, PPARγ – peroxisome proliferator-activated receptor gamma, PR – progesterone receptor, RXRα – retinoid X receptor alpha, TRα – thyroid hormone receptor

alpha, TR $\beta$  – thyroid hormone receptor beta. The high binding probability is marked with red (sensitivity < 0.25), orange (0.25 < sensitivity < 0.5) and yellow (0.5 < sensitivity < 0.75) were used to highlight decreasing probabilities, and green (sensitivity > 0.75) is used to mark the low binding probability. The docking scores are labeled next to each receptor, more negative values being associated with a higher affinity binding. Results were generated by the Endocrine Disruptome web server [20].

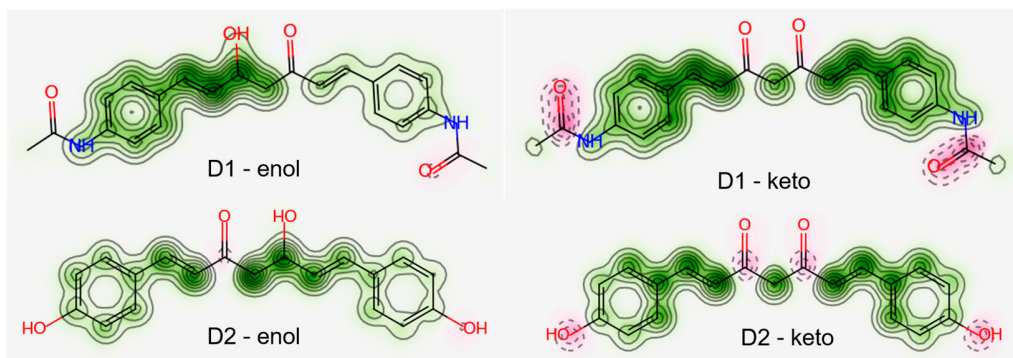

**Figure S2.** The structures of D2 and D3 compounds are colored according to the contributions of their atoms or fragments to hERG blockade. The fragments with a positive contribution are colored with green. Higher positive contributions are shown with a more intense green color and with more contour lines. The negative contributions to the blockade are highlighted in pink. Images were generated by Pred-hERG4.2 web server.

**Table S4.** Molinspiration bioactivity scores v2021.03.

| Bioactivity                              | Predicted scores |         |         |         |
|------------------------------------------|------------------|---------|---------|---------|
|                                          | D1 enol          | D1 keto | D2 enol | D2 keto |
| G-protein coupled receptor (GPCR) ligand | 0.04             | -0.10   | 0.17    | 0.00    |
| Ion channel modulator                    | -0.17            | -0.25   | -0.05   | -0.14   |
| Kinase inhibitor                         | -0.27            | -0.28   | -0.26   | -0.26   |
| Nuclear receptor ligand                  | -0.06            | -0.07   | 0.24    | 0.25    |
| Protease inhibitor                       | 0.04             | -0.11   | 0.08    | -0.08   |
| Enzyme inhibitor                         | 0.23             | -0.02   | 0.45    | 0.15    |
